# Supplementary material for: DNA interference is controlled by R-loop length in a type I-F1 CRISPR-Cas system
Source: PubMed Central journal article supplement (PMC7296934; doi:10.1186/s12915-020-00799-z), 2020-06-15
Supplement: 12915_2020_799_MOESM4_ESM.pdf [file 12915_2020_799_MOESM4_ESM.pdf]

**Additional file 4: Fig. S3**

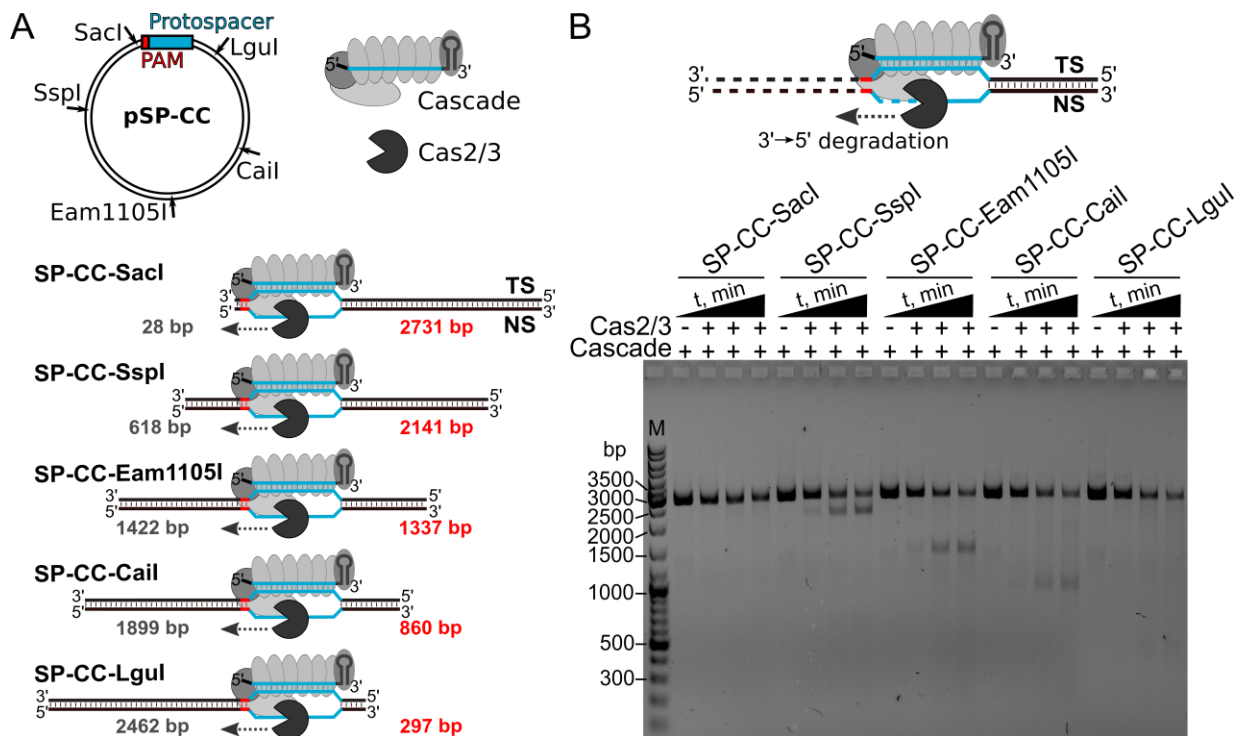

**Fig. S3. Cas2/3-mediated DNA degradation. (A) Preparation of linearized plasmid substrates.** Plasmid pSP-CC was cleaved using either of Sacl, Sspl, Eam1105I, Cail, or Lgul restriction endonucleases producing long (2759 bp) linear double-stranded DNA molecules that contain protospacer in different positions with the same directionality. A presumable double-stranded break between PAM and protospacer would generate DNA fragments of indicated lengths. **(B) Cas2/3 degradation of Cascade-bound linearized DNA targets.** Five linear DNA fragments pSP-CC-Sacl, pSP-CC-Sspl, pSP-CC-Eam1105I, pSP-CC-Cail, and pSP-CC-Lgul were pre-incubated with WT Cascade complex then treated with Cas2/3 (for 5, 30, and 60 min). Cas2/3 degrades DNA target upstream from the protospacer (in a protospacer-PAM direction) leaving downstream DNA fragment intact (red-coloured numbers in the A).
