# Supplementary material for: DNA interference is controlled by R-loop length in a type I-F1 CRISPR-Cas system
Source: PubMed Central journal article supplement (PMC7296934; doi:10.1186/s12915-020-00799-z), 2020-06-15
Supplement: 12915_2020_799_MOESM6_ESM.pdf [file 12915_2020_799_MOESM6_ESM.pdf]

Additional file 6, Fig. S5

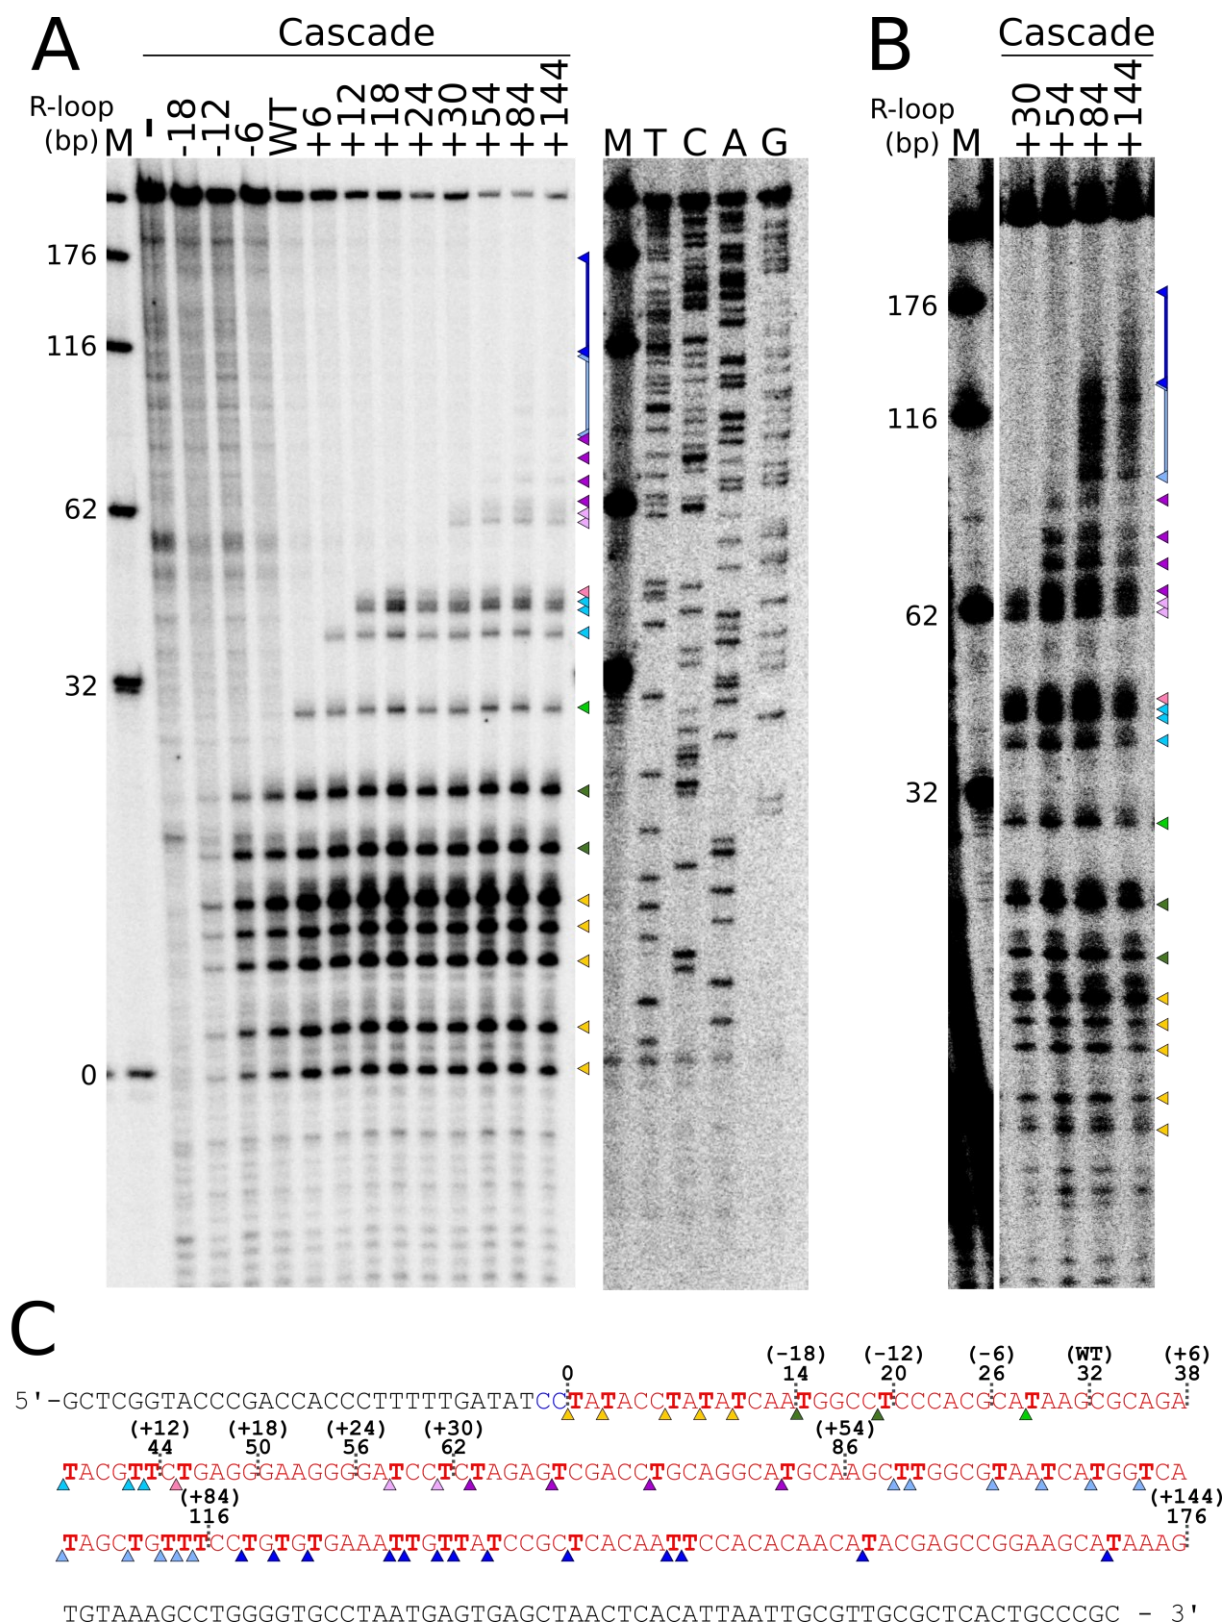

**Fig. S5.** R-loops formed by Cascade complexes containing truncated or extended spacers. (A and B) Denaturing polyacrylamide gels of DNA duplex footprints. DNA duplex SP-CC-3 was <sup>32</sup>P-labelled on the non-target DNA strand then DNA target was pre-incubated with a respective Cascade complex and treated with KMnO<sub>4</sub> for a 60 s (A) or 20 s (B). T, C, A, G lanes in the (A) represent sequencing

reactions for the non-targeting strand of the DNA target using TS911 <sup>32</sup>P-5'-labelled-oligonucleotide. The boundaries for the expected 32, 62, 116, and 176 bp length R-loops are indicated in the M lanes. **(C)** *The sequence of the non-target strand.* The protospacer region and PAM are coloured in red and blue, respectively. Triangles of different colours on the right of the gels (**A** and **B**) and within the non-target strand sequence (**C**) indicate cleavage positions near accessible thymidines (bold). Expected lengths of the R-loops formed by extended or truncated Cascade complexes (specified in parentheses) are indicated above the sequence.
