# Supplementary material for: DNA interference is controlled by R-loop length in a type I-F1 CRISPR-Cas system
Source: PubMed Central journal article supplement (PMC7296934; doi:10.1186/s12915-020-00799-z), 2020-06-15
Supplement: 12915_2020_799_MOESM10_ESM.pdf [file 12915_2020_799_MOESM10_ESM.pdf]

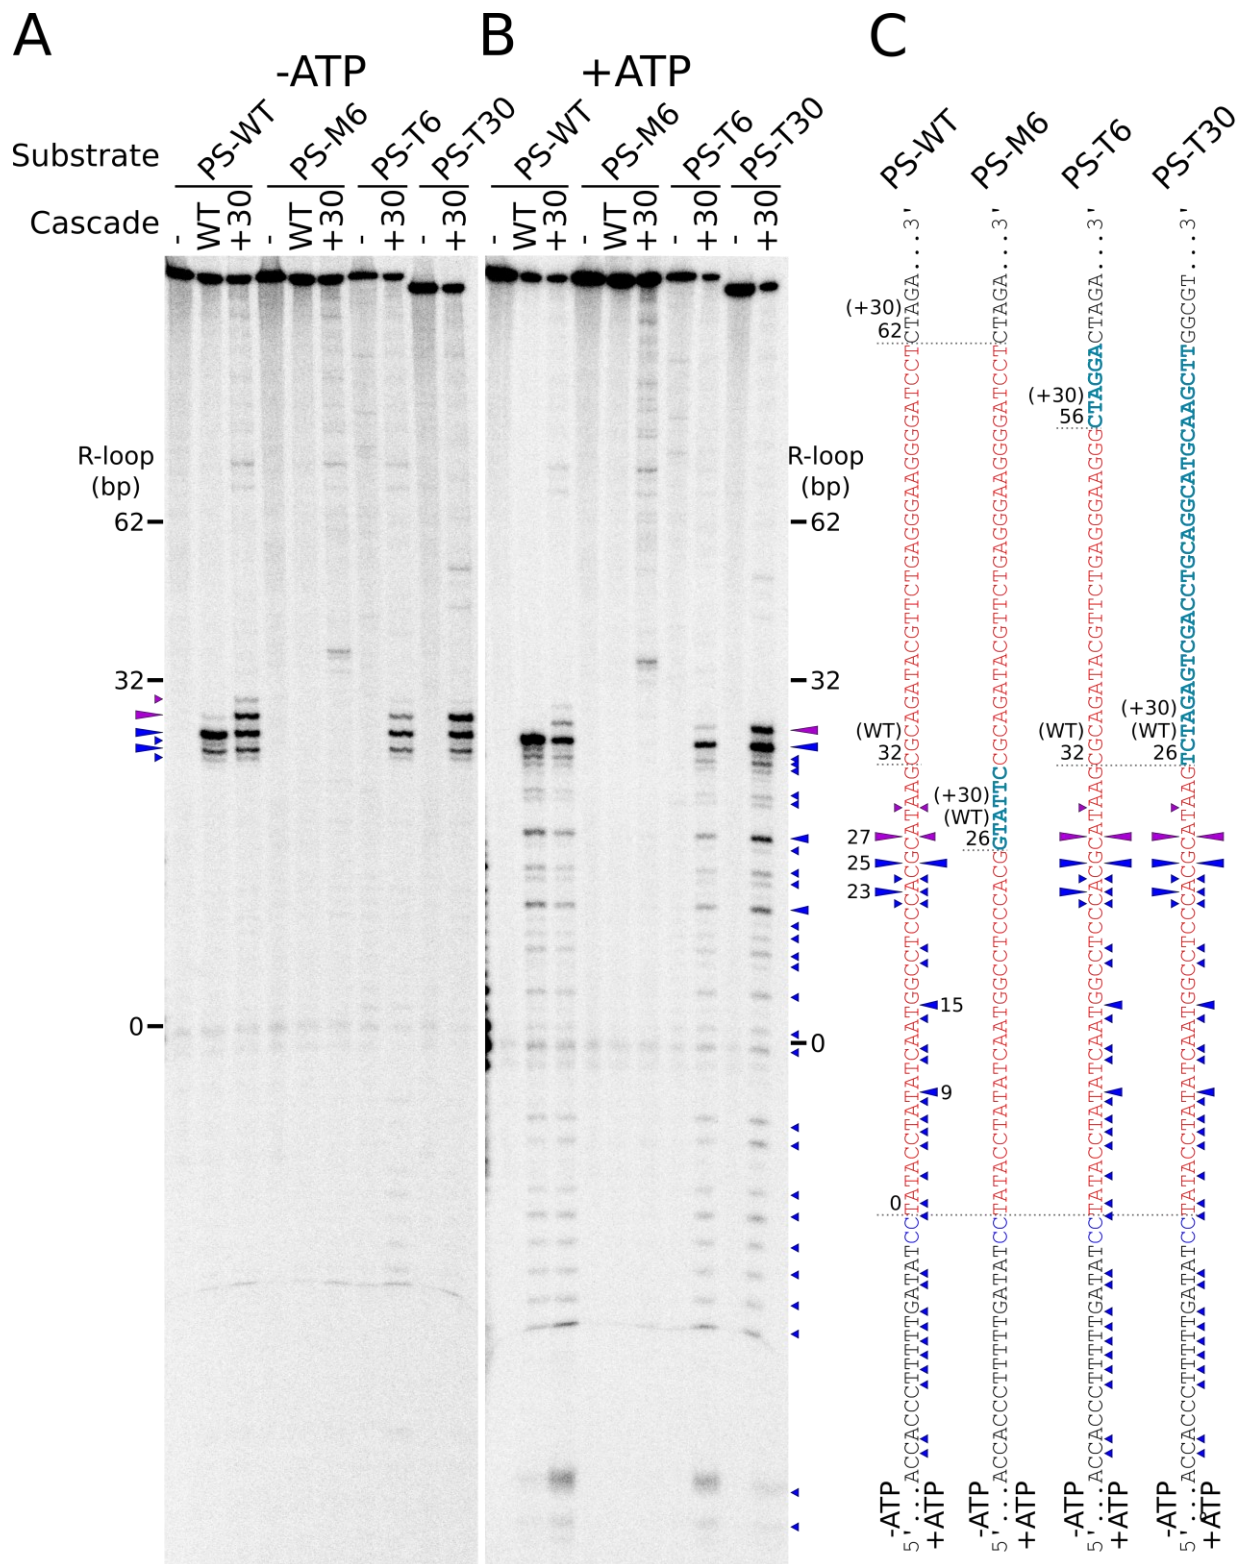

**Fig. S9. Cas2/3 cleavage within protospacers of different length. (A and B)** Denaturing polyacrylamide gels of Cas2/3-cleaved DNA targets. DNA duplexes PS-WT, PS-M6, PS-T6 and PS-T30 were <sup>32</sup>P-labelled on the non-target DNA strand then pre-incubated with WT or +30 Cascade complex in the absence (A) or presence (B) of ATP and cleavage was initiated by introducing the Cas2/3. The boundaries for the expected 32 and 62 bp length R-loops are indicated beside the gels. (C) The

*sequence of the non-target strands.* The protospacer region and PAM are coloured in red and blue, respectively. Nucleotides mismatching the PS-WT protospacer are coloured in cyan. Triangles of different colours on the right and left of the gels (**A** and **B**) and within non-target strand sequences (**C**) indicate cleavage positions of the Cas2/3. The height of the triangles correlates with a relative amount of cleavage product after 1-hour incubation with 500 nM Cas2/3 in the absence (-ATP) or presence (+ATP) of ATP. The expected lengths of the R-loops formed upon binding of WT or +30 Cascade complexes (specified in parentheses) to DNA target are indicated beside the sequences.
