# Supplementary material for: DNA interference is controlled by R-loop length in a type I-F1 CRISPR-Cas system
Source: PubMed Central journal article supplement (PMC7296934; doi:10.1186/s12915-020-00799-z), 2020-06-15
Supplement: 12915_2020_799_MOESM12_ESM.pdf [file 12915_2020_799_MOESM12_ESM.pdf]

**Additional file 12, Table S2. Expression vectors and plasmid substrates.**

| Vector            | Description                                                                                                                                                                                     | Cloning sites | Primers     | Source     |
|-------------------|-------------------------------------------------------------------------------------------------------------------------------------------------------------------------------------------------|---------------|-------------|------------|
| <b>Expression</b> |                                                                                                                                                                                                 |               |             |            |
| pCDF-Duet1        | T7 promoter based expression vector; Sm <sup>R</sup>                                                                                                                                            |               |             | Novagen    |
| pCDF-SH           | Derivative of pCDF-Duet1 where His <sub>6</sub> and S-tag sequences are replaced with Strep-II and His <sub>6</sub> sequences, respectively; Sm <sup>R</sup>                                    |               |             | [61]       |
| pACYC-Duet1       | T7 promoter based expression vector, Cm <sup>R</sup>                                                                                                                                            |               |             | Novagen    |
| pCOLA-Duet1       | <i>araC</i> promoter based expression vector, Kn <sup>R</sup>                                                                                                                                   |               |             | Novagen    |
| pET-SH            | Derivative of T7 promoter based expression vector pET-Duet1 where His <sub>6</sub> and S-tag sequences are replaced with Strep-II and His <sub>6</sub> sequences, respectively; Ap <sup>R</sup> |               |             | [61]       |
| pCd               | <i>cas8f1-cas5f1-cas7f1-cas6f</i> cassette in pCDF-SH, no tags                                                                                                                                  | NcoI/Sall     | TS382/TS615 | This study |
| pCd-H             | <i>cas8f1-cas5f1-cas7f1</i> cassette and gene of Cas6f fused at N-terminus with His <sub>6</sub> sequence in pCDF-Duet1                                                                         | NdeI/PacI     | TS757/TS394 | This study |
|                   |                                                                                                                                                                                                 | BamHI/Sall    | TS397/TS758 |            |
| pCas1-2/3         | <i>cas1-cas2/3</i> cassette in pCDF-SH, no tags                                                                                                                                                 | NdeI/PacI     | TS616/TS417 | This study |
| pCOLA-Cas1-2/3    | <i>cas1-cas2/3</i> cassette in pCOLA-Duet1, no tags                                                                                                                                             | NdeI/PacI     | TS616/TS417 | This study |
| pCas2/3-H         | <i>cas2/3</i> gene in pET-SH; C-terminus of Cas2/3 is fused with His <sub>6</sub> tag                                                                                                           | NdeI/XhoI     | TS336/TS337 | This study |
| pCd-Cas1-2/3      | <i>cas1-cas2/3</i> cassette cloned into pCDF-Cd; no tag                                                                                                                                         | NdeI/PacI     | TS616/TS417 | This study |
| pCd-Cas2/3        | <i>cas2/3</i> gene cloned into pCDF-Cd; no tag                                                                                                                                                  | NdeI/PacI     | TS336/TS417 | This study |
| pCR-cloning       | Repeats cloned into pACYC-Duet1                                                                                                                                                                 | NcoI/PacI     | TS543/TS544 | This study |
| pCR(WT)           | 32 bp spacer cloned into pCR-cloning; spacer assembled from oligos                                                                                                                              | SapI          | TS545/TS546 | This study |
| pCR(-30)          | 2 bp spacer cloned into pCR-cloning; spacer assembled from oligos                                                                                                                               | SapI/PacI     | TS772/TS773 | This study |
| pCR(-24)          | 8 bp spacer cloned into pCR-cloning; spacer assembled from oligos                                                                                                                               | SapI          | TS720/TS721 | This study |
| pCR(-18)          | 14 bp spacer cloned into pCR-cloning; spacer assembled from oligos                                                                                                                              | SapI          | TS718/TS719 | This study |
| pCR(-12)          | 20 bp spacer cloned into pCR-cloning; spacer assembled from oligos                                                                                                                              | SapI          | TS716/TS717 | This study |
| pCR(-6)           | 26 bp spacer cloned into pCR-cloning; spacer assembled from oligos                                                                                                                              | SapI          | TS714/TS715 | This study |
| pCR(+6)           | 38 bp spacer cloned into pCR-cloning; spacer was PCR amplified using pSP-CC as template                                                                                                         | SapI          | TS723/TS724 | This study |
| pCR(+12)          | 44 bp spacer cloned into pCR-cloning; spacer was PCR amplified using pSP-CC as template                                                                                                         | SapI          | TS723/TS725 | This study |

|                               |                                                                                          |             |             |            |
|-------------------------------|------------------------------------------------------------------------------------------|-------------|-------------|------------|
| pCR(+18)                      | 50 bp spacer cloned into pCR-cloning; spacer was PCR amplified using pSP-CC as template  | <i>SapI</i> | TS723/TS726 | This study |
| pCR(+24)                      | 56 bp spacer cloned into pCR-cloning; spacer was PCR amplified using pSP-CC as template  | <i>SapI</i> | TS723/TS727 | This study |
| pCR(+30)                      | 62 bp spacer cloned into pCR-cloning; spacer was PCR amplified using pSP-CC as template  | <i>SapI</i> | TS723/TS728 | This study |
| pCR(+54)                      | 86 bp spacer cloned into pCR-cloning; spacer was PCR amplified using pSP-CC as template  | <i>SapI</i> | TS723/TS829 | This study |
| pCR(+84)                      | 116 bp spacer cloned into pCR-cloning; spacer was PCR amplified using pSP-CC as template | <i>SapI</i> | TS723/TS830 | This study |
| pCR(+144)                     | 176 bp spacer cloned into pCR-cloning; spacer was PCR amplified using pSP-CC as template | <i>SapI</i> | TS723/TS776 | This study |
| <b>Substrates</b>             |                                                                                          |             |             |            |
| pSP-CC (also pPS-WT) [Target] | CC PAM and target protospacer sequences in pUC19 (pSP1-CC)                               |             |             | [34]       |
| pNT [Non-target]              | AA PAM and non-target protospacer sequences in pUC19 (pSP3-AA)                           |             |             | [34]       |
| pSP-AA                        | AA PAM and target protospacer sequences in pUC19 (pSP1-AA)                               |             |             | [34]       |
| pSP-AG                        | AG PAM and target protospacer sequences in pUC19 (pSP1-AG)                               |             |             | [34]       |
| pSP-AC                        | AC PAM and target protospacer sequences in pUC19 (pSP1-AC)                               |             |             | [34]       |
| pSP-AT                        | AT PAM and target protospacer sequences in pUC19 (pSP1-AT)                               |             |             | [34]       |
| pSP-GA                        | GA PAM and target protospacer sequences in pUC19 (pSP1-GA)                               |             |             | [34]       |
| pSP-GG                        | GG PAM and target protospacer sequences in pUC19 (pSP1-GG)                               |             |             | [34]       |
| pSP-GC                        | GC PAM and target protospacer sequences in pUC19 (pSP1-GC)                               |             |             | [34]       |
| pSP-GT                        | GT PAM and target protospacer sequences in pUC19 (pSP1-GT)                               |             |             | [34]       |
| pSP-CA                        | CA PAM and target protospacer sequences in pUC19 (pSP1-CA)                               |             |             | [34]       |
| pSP-CG                        | CG PAM and target protospacer sequences in pUC19 (pSP1-CG)                               |             |             | [34]       |
| pSP-CT                        | CT PAM and target protospacer sequences in pUC19 (pSP1-CT)                               |             |             | [34]       |
| pSP-TA                        | TA PAM and target protospacer sequences in pUC19 (pSP1-TA)                               |             |             | [34]       |
| pSP-TG                        | TG PAM and target protospacer sequences in pUC19 (pSP1-TG)                               |             |             | [34]       |
| pSP-TC                        | TC PAM and target protospacer sequences in pUC19 (pSP1-TC)                               |             |             | [34]       |
| pSP-TT                        | TT PAM and target protospacer sequences in pUC19 (pSP1-TT)                               |             |             | [34]       |
| pPS-T6                        | 6 bp mutations was introduced within 57-62 positions from the CC                         |             | TS846/TS847 | This study |

|                     |                                                                                                                                       |                  |               |            |
|---------------------|---------------------------------------------------------------------------------------------------------------------------------------|------------------|---------------|------------|
|                     | PAM in pSP-CC                                                                                                                         |                  |               |            |
| pPS-T30             | Sequence within 33-62 positions from the CC PAM was deleted in pSP-CC                                                                 |                  | TS846/TS849   | This study |
| pPS-M6              | 6 bp mutations was introduced within 27-32 positions from the CC PAM in pSP-CC                                                        |                  | TS843/TS844   | This study |
| M13mp18             | ssDNA phage; ssDNA of this phage was used for helicase, nuclease and ATPase assays; replicative dsDNA was used for cloning procedures |                  |               | NEB        |
| M13-SP-CC [Target]  | Target sequence was PCR amplefied from pSP-CC and cloned into M13mp18 phage                                                           | <i>EheI/BglI</i> | pUC-Ehe/TS911 | This study |
| M13-NT [Non-target] | Non-target sequence was PCR amplefied from pNT and cloned into M13mp18 phage                                                          | <i>EheI/BglI</i> | pUC-Ehe/TS911 | This study |

## REFERENCES

34. Sinkunas T, Gasiunas G, Waghmare SP, Dickman MJ, Barrangou R, Horvath P, Siksnys V: **In vitro reconstitution of Cascade-mediated CRISPR immunity in *Streptococcus thermophilus***. *The EMBO journal* 2013, **32**(3):385-394.
61. Drabavicius G, Sinkunas T, Silanskas A, Gasiunas G, Venclovas C, Siksnys V: **DnaQ exonuclease-like domain of Cas2 promotes spacer integration in a type I-E CRISPR-Cas system**. *EMBO reports* 2018, **19**(7).
