# Supplementary material for: DNA interference is controlled by R-loop length in a type I-F1 CRISPR-Cas system
Source: PubMed Central journal article supplement (PMC7296934; doi:10.1186/s12915-020-00799-z), 2020-06-15
Supplement: 12915_2020_799_MOESM13_ESM.pdf [file 12915_2020_799_MOESM13_ESM.pdf]

**Additional file 13, Table S3. Oligonucleotides.**

| Experiment                       | Substrate name          | Primer                                                                   | Sequence (5'→3')                                                          | Description                                                                                                            |
|----------------------------------|-------------------------|--------------------------------------------------------------------------|---------------------------------------------------------------------------|------------------------------------------------------------------------------------------------------------------------|
| Cleavage, P1 footprints, Cloning | SP-CC                   | TS169                                                                    | GACCACCCTTTTTGATATCCATACCTATATCAATGGCCTCCCACGCATAAGCGCAGATACGTTCTGAGGGAA  | Target protospacer, CC PAM, ALQ13.2 phage surrounding sequences                                                        |
|                                  |                         | TS170                                                                    | TTCCCTCAGAACGTATCTGCGCTTATGCGTGGGAGGCCATTGATATAGGTATAGGATATCAAAAAGGGTGGTC |                                                                                                                        |
|                                  | NT                      | TS140                                                                    | GACCACCCTTTTTGATATAACGCAACCCCTCCTTAGACATGGGAACAGTACTAGCAGATACGTTCTGAGGGAA | Non-target protospacer, AA PAM, ALQ13.2 phage surrounding sequences                                                    |
|                                  |                         | TS141                                                                    | TTCCCTCAGAACGTATCTGCTAGTACTGTTCCCATGTCTAAGGAGGGGTTGCGTTATATCAAAAAGGGTGGTC |                                                                                                                        |
|                                  | SP-AA                   | TS132                                                                    | GACCACCCTTTTTGATATAATATACCTATATCAATGGCCTCCCACGCATAAGCGCAGATACGTTCTGAGGGAA | Target protospacer AA PAM, ALQ13.2 phage surrounding sequences                                                         |
| TS133                            |                         | TTCCCTCAGAACGTATCTGCGCTTATGCGTGGGAGGCCATTGATATAGGTATATATATCAAAAAGGGTGGTC |                                                                           |                                                                                                                        |
| EMSA                             | SP-CC-1                 | TS276                                                                    | GTGATGACGGTGAAAACCTCTG                                                    | 800 bp long oligoduplex with CC PAM and complementary protospacer; PCR amplified using pSP-CC as template.             |
|                                  |                         | TS911                                                                    | AAAAGCCATTCAGGCGCTGATACCGCTCGCCGCAG                                       |                                                                                                                        |
| EMSA                             | NT-1                    | TS276                                                                    | GTGATGACGGTGAAAACCTCTG                                                    | 800 bp long oligoduplex without target sequence; PCR amplified using pNT as template                                   |
|                                  |                         | TS911                                                                    | AAAAGCCATTCAGGCGCTGATACCGCTCGCCGCAG                                       |                                                                                                                        |
| EMSA                             | SP-AA-1                 | TS276                                                                    | GTGATGACGGTGAAAACCTCTG                                                    | 800 bp long oligoduplex with AA PAM and complementary protospacer, PCR amplified using pSP-AA as template              |
|                                  |                         | TS911                                                                    | AAAAGCCATTCAGGCGCTGATACCGCTCGCCGCAG                                       |                                                                                                                        |
| EMSA                             | SP-CC-2                 | pUC57-Forw                                                               | GCCAGGGTTTTCCAGTCACGA                                                     | 420 bp long oligoduplex with CC PAM and complementary protospacer; PCR amplified using pSP-CC as template              |
|                                  |                         | pUC-LguR                                                                 | GCGAGGAAGCGGAAGAGCGCCC                                                    |                                                                                                                        |
| EMSA                             | SP3-AA-2                | pUC57-Forw                                                               | GCCAGGGTTTTCCAGTCACGA                                                     | 420 bp long oligoduplex without target sequence; PCR amplified using pNT as template                                   |
|                                  |                         | pUC-LguR                                                                 | GCGAGGAAGCGGAAGAGCGCCC                                                    |                                                                                                                        |
| Cleavage, Footprinting           | SP-CC-3 (also as PS-WT) | TS930 <sup>#</sup>                                                       | GCGGGCAGTGAGCGCAACG                                                       | substrate for R-loop KMnO <sub>4</sub> footprinting and Cas2/3 cleavage assays; PCR amplified using pSP-CC as template |
|                                  |                         | TS931 <sup>*</sup>                                                       | GCTCGGTACCCGACCACCCTTTTTGATATCC                                           |                                                                                                                        |
|                                  | PS-M6                   | TS930                                                                    | GCGGGCAGTGAGCGCAACG                                                       | substrate for R-loop KMnO <sub>4</sub> footprinting and Cas2/3 cleavage assays; PCR amplified using pPS-M6 as template |
|                                  |                         | TS931 <sup>*</sup>                                                       | GCTCGGTACCCGACCACCCTTTTTGATATCC                                           |                                                                                                                        |
|                                  | PS-T6                   | TS930                                                                    | GCGGGCAGTGAGCGCAACG                                                       | substrate for R-loop KMnO <sub>4</sub> footprinting and Cas2/3 cleavage                                                |

|         |        |            |                                                 |                                                                                                                                     |
|---------|--------|------------|-------------------------------------------------|-------------------------------------------------------------------------------------------------------------------------------------|
|         |        | TS931*     | GCTCGGTACCCGACCACCCTTTTTGATATCC                 | assays; PCR amplified using pPS-T6 as template                                                                                      |
|         | PS-T30 | TS930      | GCGGGCAGTGAGCGCAACG                             | substrate for R-loop KMnO <sub>4</sub> footprinting and Cas2/3 cleavage assays; PCR amplified using pPS-T30 as template             |
|         |        | TS931*     | GCTCGGTACCCGACCACCCTTTTTGATATCC                 |                                                                                                                                     |
| Markers | M-32   | TS932      | CTTATGCGTGGGAGGCCAT                             | Marker for 32-bp R-loop boundary in KMnO <sub>4</sub> footprinting; PCR amplified using pSP-CC as template                          |
|         |        | TS931*     | GCTCGGTACCCGACCACCCTTTTTGATATCC                 |                                                                                                                                     |
|         | M-62   | TS933      | AGGATCCCCTTCCCTCAGA                             | Marker for 62-bp R-loop boundary in KMnO <sub>4</sub> footprinting; PCR amplified using pSP-CC as template                          |
|         |        | TS931*     | GCTCGGTACCCGACCACCCTTTTTGATATCC                 |                                                                                                                                     |
|         | M-116  | TS934      | AAACAGCTATGACCATGAT                             | Marker for 116-bp R-loop boundary in KMnO <sub>4</sub> footprinting; PCR amplified using pSP-CC as template                         |
|         |        | TS931*     | GCTCGGTACCCGACCACCCTTTTTGATATCC                 |                                                                                                                                     |
|         | M-176  | TS935      | CTTTATGCTTCCGGCTCGT                             | Marker for 176-bp R-loop boundary in KMnO <sub>4</sub> footprinting; PCR amplified using pSP-CC as template                         |
|         |        | TS931*     | GCTCGGTACCCGACCACCCTTTTTGATATCC                 |                                                                                                                                     |
|         |        | TS166      | TTCCCTCAGAACGTATCT                              | <sup>32</sup> P-5'-end-labelled oligonucleotides used for target strand dideoxy sequencing of SP-CC (complementary to TS169)        |
|         |        | TS153      | GACCACCCTTTTTGATAT                              | <sup>32</sup> P-5'-end-labelled oligonucleotides used for target strand dideoxy sequencing of SP-CC (complement to TS170)           |
|         |        | TS239      | TTCCCTCAGAACGTAT                                | <sup>32</sup> P-5'-end-labelled oligonucleotides used as markers (37, 39, 42, 44, and 46) for the target strand of the SP-CC.       |
|         |        | TS240      | TTCCCTCAGAACGT                                  |                                                                                                                                     |
|         |        | TS241      | TTCCCTCAGAAC                                    |                                                                                                                                     |
|         |        | TS242      | TTCCCTCAGA                                      |                                                                                                                                     |
|         |        | TS168      | TTCCCTCA                                        |                                                                                                                                     |
|         |        | TS232      | GACCACCCTTTTTGAT                                |                                                                                                                                     |
|         |        | TS233      | GACCACCCTTTTTG                                  | <sup>32</sup> P-5'-end-labelled oligonucleotides used as markers (-5, -7, -9, -11, and -13) for the non-target strand of the SP-CC. |
|         |        | TS234      | GACCACCCTTTT                                    |                                                                                                                                     |
|         | TS235  | GACCACCCTT |                                                 |                                                                                                                                     |
|         | TS155  | GACCACCC   |                                                 |                                                                                                                                     |
|         |        |            |                                                 |                                                                                                                                     |
| Cloning |        | TS336      | <u>tcatatgaatacttacttqtagccaatg</u>             | cas2/3 + NdeI (fw)                                                                                                                  |
|         |        | TS337      | <u>tctcgagatcttctgccaaaaaccagc</u>              | cas2/3 + XhoI (rv)                                                                                                                  |
|         |        | TS382      | <u>tattcgtctcccataaactaaaacaacagtagtaaaagcc</u> | cas8f + Esp3I (fw)                                                                                                                  |
|         |        | TS394      | <u>gtgttaaftaactattcctaccgcttgcgcc</u>          | cas7 + PaeI (rv)                                                                                                                    |
|         |        | TS397      | <u>tattgatcctatgacagtgcaaaccattacattg</u>       | cas6f + BamHI (fw)                                                                                                                  |

|  |       |                                                                                 |                                  |
|--|-------|---------------------------------------------------------------------------------|----------------------------------|
|  | TS417 | <u>agttaatcaatcttctgcccacccagc</u>                                              | cas3 + PacI (rv)                 |
|  | TS543 | <u>tatccatggtcactgccgaataggcagcttagaaatgaagagccgagctcgccgctgcaggtcgacaagc</u>   | pACYC-Duet1 + repeat + NcoI (fw) |
|  | TS544 | <u>ctcttaatatttctaagctgcctattcggcagtgaaatgaagagcgcttgcgacctgcagccgcccagctcg</u> | pACYC-Duet1 + repeat + PacI (rv) |
|  | TS545 | <u>aaatatacctatatcaatggcctcccacgcataag</u>                                      | 32 bp (WT) spacer (fw)           |
|  | TS546 | <u>aagcttagcgtgggagccattgatataggata</u>                                         | 32 bp (WT) spacer (rv)           |
|  | TS615 | <u>tttgcgacttagaaatgtggaacgggtgtagttg</u>                                       | cas6f + Sall (rv)                |
|  | TS616 | <u>tttcatatgcctaagacccttacattc</u>                                              | cas1 + NdeI (fw)                 |
|  | TS714 | <u>aaatatacctatatcaatggcctcccacg</u>                                            | 26 bp spacer (fw)                |
|  | TS715 | <u>aagcgtgggagccattgatataggata</u>                                              | 26 bp spacer (rv)                |
|  | TS716 | <u>aaatatacctatatcaatggcct</u>                                                  | 20 bp spacer (fw)                |
|  | TS717 | <u>aagagccattgatataggata</u>                                                    | 20 bp spacer (rv)                |
|  | TS718 | <u>aaatatacctatatcaa</u>                                                        | 14 bp spacer (fw)                |
|  | TS719 | <u>aagttgatataggata</u>                                                         | 14 bp spacer (rv)                |
|  | TS720 | <u>aaatataccta</u>                                                              | 8 bp spacer (fw)                 |
|  | TS721 | <u>aagtaggtata</u>                                                              | 8 bp spacer (rv)                 |
|  | TS723 | <u>atagctctcaaaaatacctatatcaatggcctccc</u>                                      | elongated spacers + SapI (fw)    |
|  | TS724 | <u>atagctctcaaaagctgccttatgcgtggga</u>                                          | 38 bp spacer + SapI (rv)         |
|  | TS725 | <u>atagctctcaaaagacgtatctgcgcttatgcg</u>                                        | 44 bp spacer + SapI (rv)         |
|  | TS726 | <u>atagctctcaaaagcctcagaacgtatctgcgc</u>                                        | 50 bp spacer + SapI (rv)         |
|  | TS727 | <u>atagctctcaaaagccctccctcagaacgtat</u>                                         | 56 bp spacer + SapI (rv)         |
|  | TS728 | <u>atagctctcaaaagggatcccctccctcaga</u>                                          | 62 bp spacer + SapI (rv)         |
|  | TS757 | <u>tttcatatgataactaaacaacagtagtaaaagcc</u>                                      | cas8f + NdeI (fw)                |
|  | TS758 | <u>tttgcgacttagaaatgtggaacgggtgtagttg</u>                                       | cas6f + Sall (rv)                |
|  | TS772 | <u>aaatcttcaactgccgaataggcagcttagaaat</u>                                       | 2bp spacer + repeat (fw)         |
|  | TS773 | <u>taatttctaagctgcctattcggcagtgaaqfa</u>                                        | 2bp spacer + repeat (rv)         |
|  | TS776 | <u>atagctctcaaaagcttatgctccggctcgtatg</u>                                       | 176 bp spacer + SapI (rv)        |
|  | TS829 | <u>atagctctcaaaagtcacgctgcaggtcgac</u>                                          | 86 bp spacer + SapI (rv)         |

|  |         |                                           |                                                                                                |
|--|---------|-------------------------------------------|------------------------------------------------------------------------------------------------|
|  | TS830   | <u>atagctcttcaagaacagctatgacatgattacg</u> | 116 bp spacer + SapI (rv)                                                                      |
|  | TS843   | GTATTC <u>cg</u> cagatacgttctgaggg        | 6 bp mismatch (within 27-32 bp positions) at the PAM distal end of the 32 bp protospacer (fw)  |
|  | TS844   | cgtgggaggccattgatatag                     | 6 bp mismatch (within 27-32 bp positions) at the PAM distal end of the 32 bp protospacer (rv)  |
|  | TS846   | ctagagtcgacctgcaggc                       | 6 bp mismatch and 30 bp deletion of the PAM distal end of the 62 bp protospacer (fw)           |
|  | TS847   | TCCTAG <u>cccctccctcagaacgtatc</u>        | 6 bp mismatch (within 57-62 bp positions) at the PAM distal end of the 62 bp protospacer (rv)  |
|  | TS849   | <u>Acttatgcgtgggaggccattg</u>             | 30 bp deletion (within 33-62 bp positions) at the PAM distal end of the 62 bp protospacer (rv) |
|  | TS911   | aaaagccattcagggcgtgataccgctcgcgcag        | pUC19 + BglI (rv); for cloning into M13mp18                                                    |
|  | pUC-Ehe | <u>ccgcatcaggcgccattcgcc</u>              | for cloning into M13mp18 (fw)                                                                  |

# <sup>32</sup>P-5'-end-labelled oligonucleotide was used for the DNA production with the labelled target strand;

\* <sup>32</sup>P-5'-end-labelled oligonucleotide was used for the DNA production with the labelled non-target strand.
